# Supplementary material for: p53 mutations define the chromatin landscape to confer drug tolerance in pancreatic cancer
Source: PubMed Central journal article supplement (PMC8936522; doi:10.1002/1878-0261.13161), 2022-02-11

**a**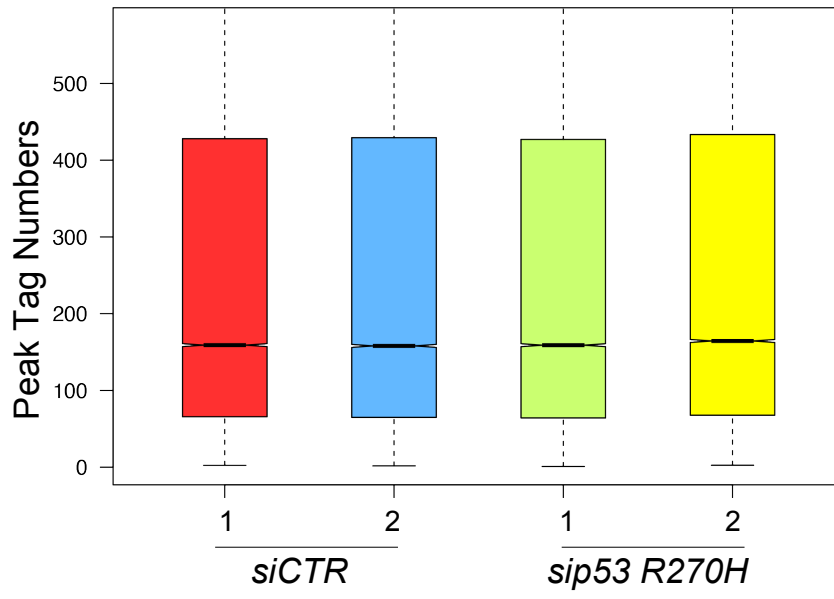**b**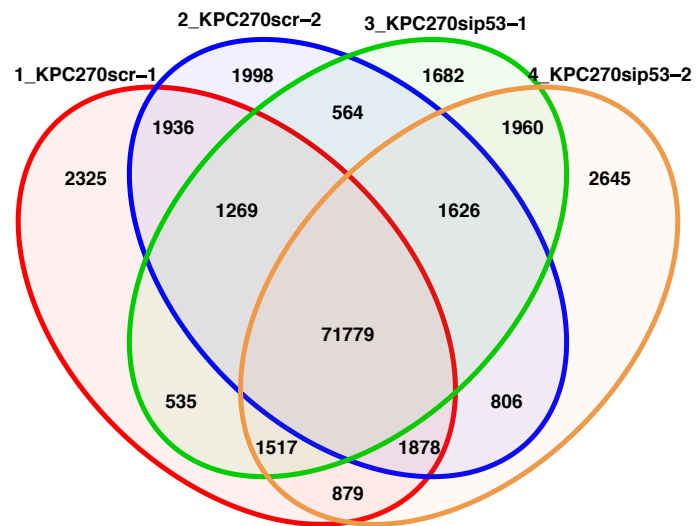

Supplement: MOL2-16-1259-s004.pdf [file MOL2-16-1259-s004.pdf]
